# Supplementary material
Source: Springer Nature journal article supplement (https://www.springermedizin.de/resource/supplementary/12968_2011_2028_MOESM4_ESM.pdf/9581166)

Exp 1   Exp 2   Exp 3

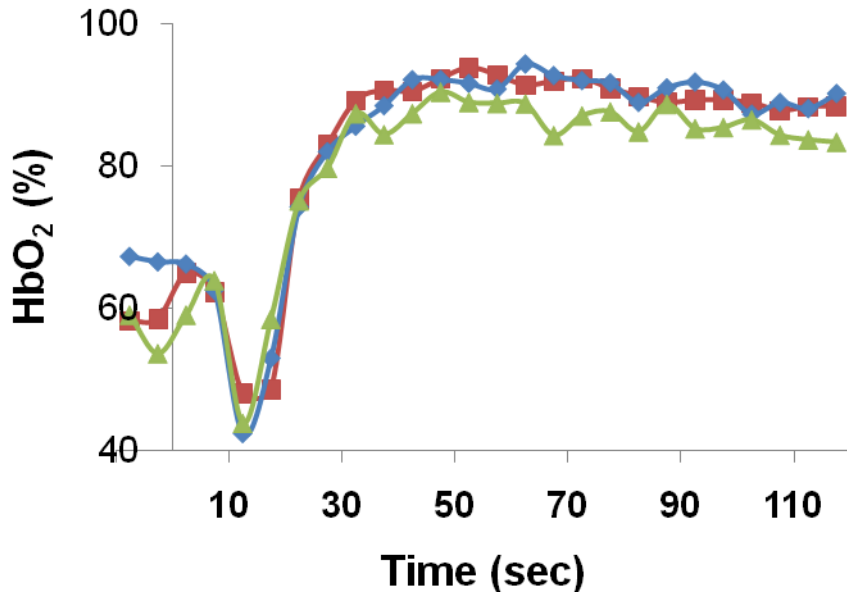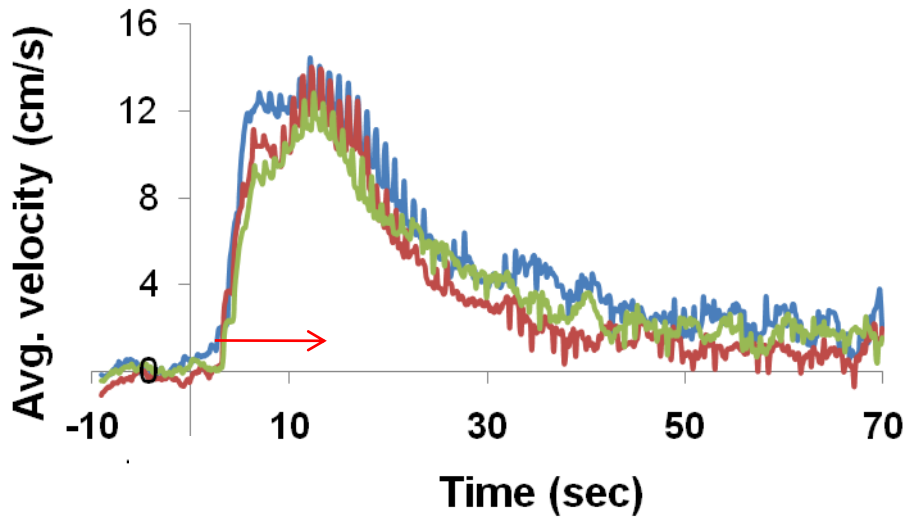

Supplement: MOESM4 [file 9581166]
